# Supplementary material
Source: PubMed Central journal article supplement (PMC4790752)
Supplement: myus008451.ww1_default.pdf [file myus008451.ww1_default.pdf]

**Appendix 1** Characteristics of Trials Included in the Final Meta-Analysis (n = 50) [posted as supplied by author]

| Source (Project Name)          | Country Location | Design (Type of Prevention) | Participants (Average Age, y; Women, %)                                                       | Duration of Supplementa tion, y (Follow-up Period, y) | Intervention vs. Control                                         | Main Outcome Measures Used in the Present Meta-analysis        | No. of participants for major CV events /No. of participants |              |
|--------------------------------|------------------|-----------------------------|-----------------------------------------------------------------------------------------------|-------------------------------------------------------|------------------------------------------------------------------|----------------------------------------------------------------|--------------------------------------------------------------|--------------|
|                                |                  |                             |                                                                                               |                                                       |                                                                  |                                                                | Supplement group                                             | Conrol group |
| 1 Korpela et al, 1989          | n.a.             | RDBPCT (Secondary)          | 81 patients with AMI                                                                          | 6 (6)                                                 | Selenium-rich yeast (122 µg/d) vs. placebo                       | Cardiac death and non-fatal reinfarct                          | 1/40                                                         | 6/41         |
| 2 Kuklinski et al, 1994        | Germany          | RDBPCT (Secondary)          | 61 patients with AMI                                                                          | 1(1)                                                  | Sodium selenite (100 µg/d) + coenzyme Q10 (100 mg/d) vs. placebo | Cardiac death                                                  | 0/32                                                         | 6/29         |
| 3 Steiner et al, 1995          | U.S.             | RDBPCT (Secondary)          | 100 patients with TIA (71; 58)                                                                | 2 (2)                                                 | Vitamin E (400 IU/d) + aspirin (325 mg/d) vs. aspirin (325 mg/d) | Stroke, recurrent TIA, hemorrhagic events, and other CV events | 9/52                                                         | 13/48        |
| 4 Omenn et al, 1996 (CARET)    | U.S.             | RDBPCT (Primary)            | 18314 smokers (current and former) and workers exposed to asbestos (57;44)                    | 4 (4)                                                 | Beta-carotene (30 mg/d) + vitamin A (25,000 IU/d) vs. placebo    | CV death                                                       | 226/9420                                                     | 151/8894     |
| 5 Stephens et al, 1996 (CHAOS) | U.K.             | RDBPCT (Secondary)          | 2002 patients with angiographically proven coronary atherosclerosis (62; 16)                  | 1.5 (1.5)                                             | Vitamin E (400 or 800 IU/d) vs. placebo                          | Major CV events                                                | 41/1035                                                      | 62/967       |
| 6 Mark et al, 1996 (LNIT)      | China            | RDBPCT (Primary)            | 3318 patients with esophageal dysplasia (54; 56)                                              | 6 (6)                                                 | Multiple vitamin/mineral supplements* daily vs. placebo          | Cerebrovascular death                                          | 22/1657                                                      | 35/1661      |
| 7 Hennekens et al, 1996 (PHS)  | U.S.             | RDBPCT (Primary)            | 22071 U.S. male physicians (40-84; 0)                                                         | 12 (12)                                               | Beta-carotene (50 mg/alternate day) vs. placebo                  | All important CV events                                        | 967/11036                                                    | 972/11035    |
| 8 Greenberg et al, 1996 (SCP)  | U.S.             | RDBPCT (Primary)            | 1720 patients with nonmelanoma skin cancer (basal cell or squamous cell skin cancer) (63; 31) | 4.3 (8.2)                                             | Beta-carotene (50 mg/d) vs. placebo                              | CV death                                                       | 68/861                                                       | 59/859       |
| 9 Rapola et al, 1997 (ATBC)    | Finland          | RDBPCT (Secondary)          | 1862 men with a history of myocardial infarction (60; 0)                                      | 5.3 (5.3)                                             | Beta-carotene (20 mg/d) or vitamin E (50 mg/d) vs. placebo       | All coronary events                                            | 330/1424                                                     | 94/438       |

|    |                               |                 |                    |                                                                             |           |                                                                                                                    |                                              |            |          |
|----|-------------------------------|-----------------|--------------------|-----------------------------------------------------------------------------|-----------|--------------------------------------------------------------------------------------------------------------------|----------------------------------------------|------------|----------|
| 10 | Virtamo et al, 1998 (ATBC)    | Finland         | RDBPCT (Primary)   | 27171 male smokers with no history of myocardial infarction (57; 0)         | 6.1 (6.1) | Beta-carotene (20 mg/d) or vitamin E (50 mg/d) vs. placebo                                                         | Primary major coronary events                | 1577/20422 | 534/6849 |
| 11 | Marchioli et al, 1999 (GISSI) | Italy           | OLRCT (Secondary)  | 11324 patients surviving recent (<3 months) myocardial infarction (59; 15)  | 3.5 (3.5) | Vitamin E (300 mg/d) vs. none                                                                                      | CV death, non-fatal MI, and non-fatal stroke | 571/5666   | 584/5668 |
| 12 | Komulainen et al, 1999 (KOS)  | Finland         | RDBPCT (Primary)   | 323 postmenopausal women (53; 100)                                          | 5 (5)     | Vitamin D3 (300 and 100 IU/d during the fifth year) + calcium (93 mg/d) with or without HRT vs. calcium (93 mg/d)  | MI                                           | 4/228      | 0/115    |
| 13 | Green et al, 1999 (NSCP)      | Australia       | RDBPCT (Primary)   | 1621 residents (49; 56)                                                     | 4.5 (4.5) | Beta-carotene (30 mg/d) with or without daily application of a sun protection factor 15-plus sunscreen vs. placebo | CVD                                          | 6/801      | 12/820   |
| 14 | Yusuf et al, 2000 (HOPE)      | Canada          | RDBPCT (Secondary) | 9541 patients with a history CVD or DM at high risk for CV events (66; 27)  | 4.5 (4.5) | Vitamin E (400 IU/d) with or without ramipril vs. placebo                                                          | MI, stroke, and death from CV causes         | 772/4761   | 739/4780 |
| 15 | Boaz et al, 2000 (SPACE)      | Israel          | RDBPCT (Secondary) | 196 hemodialysis patients with pre-existing cardiovascular disease (65; 31) | 1.4 (1.4) | Vitamin E (800 IU/d) vs. placebo                                                                                   | Total CVD endpoints including sudden death   | 18/97      | 34/99    |
| 16 | Brown et al, 2001 (HATS)      | Canada and U.S. | RDBPCT (Secondary) | 160 patients with coronary disease and low HDL cholesterol levels (53; 13)  | 3 (3)     | Vitamin C (1000 mg/d) + vitamin E (800 IU/d) + natural beta-carotene (25 mg/d) + selenium (100 µg/d) vs. placebo   | CV death or nonfatal infarct                 | 3/42       | 7/38     |

|    |                               |                 |                    |                                                                                                                                                        |            |                                                                                                        |                               |            |            |
|----|-------------------------------|-----------------|--------------------|--------------------------------------------------------------------------------------------------------------------------------------------------------|------------|--------------------------------------------------------------------------------------------------------|-------------------------------|------------|------------|
| 17 | Roncaglioni et al, 2001 (PPP) | Italy           | OLRCT (Secondary)  | 4495 patients with hypertension, hypercholesterolemia, DM, obesity, family history of premature myocardial infarction, or elderly individuals (64; 58) | 3.6 (3.6)  | Vitamin E (300 mg/d) with or without aspirin (100 mg/d) vs. control                                    | Total CV events or CVD        | 158/2231   | 170/2264   |
| 18 | You et al, 2001               | China           | RDBPCT (Primary)   | 3411 residents (35-69; n.a.)                                                                                                                           | 3.3 (3.3)  | Vitamin C (500 mg/d) + vitamin E (200 IU/d) + beta-carotene (15 mg/d) + selenium (75 µg/d) vs. placebo | CV death                      | 9/1706     | 12/1705    |
| 19 | Baker et al, 2002             | n.a.            | RDBPCT (Secondary) | 1882 patients with CHD (n.a.)                                                                                                                          | 1.7 (n.a.) | Folic acid (5 mg/d) vs. placebo                                                                        | CHD                           | 23/942     | 12/940     |
| 20 | Collins et al, 2002 (HPS)     | U.K.            | RDBPCT (Secondary) | 20536 patients with coronary disease, other occlusive disease, or DM (40-80; 25)                                                                       | 5 (5)      | Vitamin C (250 mg/d) + vitamin E (600 mg/d) + beta-carotene (20 mg/d) vs. placebo                      | Any major vascular event      | 2306/10269 | 2312/10267 |
| 21 | Schnyder et al, 2002 (SHS)    | Switzerland     | RDBPCT (Secondary) | 553 patients with established coronary atherosclerosis after percutaneous coronary intervention (63; 20)                                               | 0.5 (0.9)  | Folic acid (1 mg/d) + vitamin B6 (10 mg/d) + vitamin B12 (400 µg/d) vs. placebo                        | Nonfatal MI and cardiac death | 10/272     | 18/281     |
| 22 | Waters et al, 2002 (WAVE)     | U.S. and Canada | RDBPCT (Secondary) | 423 postmenopausal women with coronary stenosis (65; 100)                                                                                              | 2.8 (2.8)  | Vitamin C (500 mg twice/d) + vitamin E (400 IU twice/d) vs. placebo                                    | CV death or nonfatal MI       | 14/212     | 8/211      |
| 23 | Liem et al, 2003 (Goes)       | The Netherlands | OLRCT (Secondary)  | 593 patients with stable CAD (65; 22)                                                                                                                  | 2 (2)      | Folic acid (0.5 mg/d) vs. control                                                                      | CV death and or any CV events | 32/300     | 28/293     |
| 24 | Righetti et al, 2003          | Italy           | OLRCT (Primary)    | 81 chronic hemodialysis patients (64; 44)                                                                                                              | 1 (1)      | Folic acid (5 mg or 15 mg/d) vs. control                                                               | New CV events                 | 13/51      | 11/30      |
| 25 | Trivedi et al, 2003           | U.K.            | RDBPCT (Primary)   | 2686 men and women living in the general community (75; 24)                                                                                            | 5 (5)      | Vitamin D3 (100,000 IU/4 m) vs. placebo                                                                | CVD                           | 477/1345   | 503/1341   |

|    |                                   |                             |                    |                                                                      |             |                                                                                                                                                                    |                                       |           |           |
|----|-----------------------------------|-----------------------------|--------------------|----------------------------------------------------------------------|-------------|--------------------------------------------------------------------------------------------------------------------------------------------------------------------|---------------------------------------|-----------|-----------|
| 26 | Lange et al, 2004                 | Germany and the Netherlands | RDBPCT (Secondary) | 636 patients who had undergone successful coronary stenting (61; 73) | 0.5 (0.5)   | Folic acid (1.2 mg/d) + vitamin B6 (48 mg/d) + vitamin B12 (60 µg/d) vs. placebo                                                                                   | Major adverse coronary events         | 53/316    | 35/320    |
| 27 | Hercberg et al, 2004 (SU.VI.MA X) | France                      | RDBPCT (Primary)   | 12,741 adults (35-60; 61)                                            | 7.5 (7.5)   | Vitamin C (120 mg/d) + vitamin E (30 mg/d) + beta-carotene (6 mg/d) + selenium (100 µg/d) + zinc (20 mg/d) vs. placebo                                             | Ischemic CVD                          | 134/6364  | 137/6377  |
| 28 | Toole et al, 2004 (VISP)          | U.S., Canada, and Scotland  | RDBPCT (Secondary) | 3,680 patients with nondisabling ischemic stroke (66; 38)            | 2 (2)       | High dose: folic acid (2.5 mg/d) + vitamin B6 (25 mg/d) + vitamin B12 (0.4 mg/d) vs. low dose: folic acid (20 µg/d) + vitamin B6 (200 µg/d) + vitamin B12 (6 µg/d) | Ischemic stroke or CHD                | 249/1827  | 257/1853  |
| 29 | Wrone et al, 2004                 | U.S.                        | RDBPCT (Primary)   | 510 patients with ESRD (60; 50)                                      | 2 (2)       | Folic acid (5 mg/d) or folic acid (15 mg/d) vs. folic acid (1 mg/d) with multivitamins† in all arms                                                                | MI, cerebrovascular accident, and TIA | 34/342    | 13/168    |
| 30 | Brazier et al, 2005               | France                      | RDBPCT (Primary)   | 192 ambulatory elderly women with vitamin D insufficiency (75; 100)  | 1 (1)       | Vitamin D3 (400 IU twice/d) + calcium carbonate (500 mg twice/d) vs. placebo                                                                                       | CV events                             | 6/95      | 5/96      |
| 31 | Lee et al, 2005 (WHS)             | U.S.                        | RDBPCT (Primary)   | 39876 healthy women (55; 100)                                        | 10.1 (10.1) | Vitamin E (600 IU/alternate day) vs. placebo                                                                                                                       | Major CV events                       | 482/19937 | 517/19939 |
| 32 | Zoungas et al, 2006 (ASFAST)      | Australia and New Zealand   | RDBPCT (Primary)   | 315 patients with CRF (57; 32)                                       | 3.6 (3.6)   | Folic acid (15 mg/d) vs. placebo                                                                                                                                   | All CV events or death from CV cause  | 77/156    | 86/159    |

|    |                             |                                                                             |                    |                                                                                 |           |                                                                                                                                                          |                                                                                                                 |            |            |
|----|-----------------------------|-----------------------------------------------------------------------------|--------------------|---------------------------------------------------------------------------------|-----------|----------------------------------------------------------------------------------------------------------------------------------------------------------|-----------------------------------------------------------------------------------------------------------------|------------|------------|
| 33 | Lonn et al, 2006 (HOPE-2)   | 13 countries including Canada, U.S., Brazil, western Europe, Slovakia, etc. | RDBPCT (Secondary) | 5,522 patients who had vascular disease or diabetes (69; 28)                    | 5 (5)     | Folic acid (2.5 mg/d) + vitamin B6 (50 mg/d) + vitamin B12 (1 mg/d) vs. placebo                                                                          | Composite of death from CV causes, myocardial infarction, or stroke                                             | 519/2758   | 547/2764   |
| 34 | Bonaa et al, 2006 (NORVIT)  | Norway                                                                      | RDBPCT (Secondary) | 3,749 patients who had had an acute MI (63; 26)                                 | 3 (3)     | Folic acid (0.8 mg/d) + vitamin B6 (40 mg/d) + vitamin B12 (0.4 mg/d) / folic acid (0.8 mg/d) + vitamin B12 (0.4 mg/d)/ vitamin B6 (40 mg/d) vs. placebo | Nonfatal or fatal MI (including sudden death attributed to coronary heart disease) and nonfatal or fatal stroke | 544/2806   | 172/943    |
| 35 | Stranges et al, 2006 (NPC)  | U.S.                                                                        | RDBPCT (Primary)   | 1,004 nonmelanoma skin cancer patients without CVD                              | 7.6 (7.6) | Selenium (200 µg/d) vs. placebo                                                                                                                          | All CVD                                                                                                         | 103/504    | 96/500     |
| 36 | Jamison et al, 2007 (HOST)  | U.S.                                                                        | RDBPCT (Primary)   | 2,056 patients with advanced chronic kidney disease or ESRD (66; 2)             | 3.2 (3.2) | Folic acid (40 mg/d) + vitamin B6 (100 mg/d) + vitamin B12 (2 mg/d) + vs. placebo                                                                        | MI and stroke                                                                                                   | 166/1032   | 191/1024   |
| 37 | Hsia et al, 2007 (WHI)      | U.S.                                                                        | RDBPCT (Primary)   | 36,282 postmenopausal women (62; 100)                                           | 7 (7)     | Vitamin D3 (200 IU twice/d) + calcium carbonate (500 mg twice/d) vs. placebo                                                                             | CV events                                                                                                       | 2281/18176 | 2172/18106 |
| 38 | Berggren et al, 2008        | Sweden                                                                      | OLRCT (Primary)    | 199 older people with femoral neck fractures (82; 74)                           | 1 (1)     | Vitamin D (800 IU/d) + calcium (1000 mg/d) vs. control                                                                                                   | CVD                                                                                                             | 47/102     | 40/97      |
| 39 | Millman et al, 2008 (ICARE) | Israel                                                                      | RDBPCT (Primary)   | 1,434 patients with DM (69; 52)                                                 | 1.5 (1.5) | Vitamin E (400 IU/d) vs. placebo                                                                                                                         | MI, stroke, and CV death                                                                                        | 16/102     | 40/97      |
| 40 | Prince et al, 2008          | Australia                                                                   | RDBPCT (Primary)   | 302 elderly women with a low serum 25-hydroxy vitamin D concentration (77; 100) | 1 (1)     | Vitamin D2 (1,000 IU/d) + calcium citrate (1,000 mg/d) vs. placebo + calcium citrate (1,000 mg/d)                                                        | Ischemic heart disease and stroke                                                                               | 5/151      | 6/151      |

|    |                               |         |                    |                                                                                                                        |           |                                                                                                                                                                                                                   |                                  |           |           |
|----|-------------------------------|---------|--------------------|------------------------------------------------------------------------------------------------------------------------|-----------|-------------------------------------------------------------------------------------------------------------------------------------------------------------------------------------------------------------------|----------------------------------|-----------|-----------|
| 41 | Albert et al, 2008 (WAFACS)   | U.S.    | RDBPCT (Secondary) | 5,442 women who were US health professionals with either a history of CVD or 3 or more coronary risk factors (63; 100) | 7.3 (7.3) | Folic acid (2.5 mg/d) + vitamin B6 (50 mg/d) + vitamin B12 (1 mg/d) vs. placebo                                                                                                                                   | Combined major CVD               | 406/2721  | 390/2721  |
| 42 | Ebbing et al, 2008 (WENBIT)   | Norway  | RDBPCT (Secondary) | 3,096 patients with coronary artery disease or aortic valve stenosis (62; 79)                                          | 3.2 (3.2) | Folic acid (0.8 mg/d) + vitamin B6 (40 mg/d) + vitamin B12 (0.4 mg/d)/ folic acid (0.8 mg/d) + vitamin B12 (0.4 mg/d)/ vitamin B6 (40 mg/d) vs. placebo                                                           | AMI, unstable angina, and stroke | 313/2311  | 104/779   |
| 43 | Hodis et al, 2009 (BVAIT)     | U.S.    | RDBPCT (Primary)   | 506 people with a high fasting plasma total homocysteine level (61; 39)                                                | 3.1 (3.1) | Folic acid (5 mg/d) + vitamin B6 (50 mg/d) + vitamin B12 (0.4 mg/d) vs. placebo                                                                                                                                   | CV events                        | 9/254     | 11/252    |
| 44 | House et al, 2010 (DIVINE)    | Canada  | RDBPCT (Primary)   | 238 patients with type 1 or 2 diabetes and a clinical diagnosis of diabetic nephropathy (60; 11)                       | 2.7 (2.7) | Folic acid (2.5 mg/d) + vitamin B6 (25 mg/d) + vitamin B12 (1 mg/d) vs. placebo                                                                                                                                   | MI and stroke                    | 14/119    | 5/119     |
| 45 | Heinz et al, 2010             | Germany | RDBPCT (Primary)   | 650 patients with ESRD (61; 42)                                                                                        | 2 (2)     | Folic acid (5 mg three times/w) + vitamin B6 (20 mg three times/w) + vitamin B12 (50 µg three times/w) vs. folic acid (0.2 mg three times/w) + vitamin B6 (1 mg three times/w) + vitamin B12 (4 µg three times/w) | CV events                        | 83/327    | 98/323    |
| 46 | Armitage et al, 2010 (SEARCH) | U.K.    | RDBPCT (Secondary) | 12,064 survivors of myocardial infarction (64; 17)                                                                     | 6.7 (6.7) | Folic acid (2 mg/d) + vitamin B12 (1 mg/d) vs. placebo                                                                                                                                                            | Major coronary events and stroke | 1537/6033 | 1493/6031 |

|    |                                 |                                                                                 |                    |                                                                                    |             |                                                                                                                                                        |                                                     |          |          |
|----|---------------------------------|---------------------------------------------------------------------------------|--------------------|------------------------------------------------------------------------------------|-------------|--------------------------------------------------------------------------------------------------------------------------------------------------------|-----------------------------------------------------|----------|----------|
| 47 | Galan et al, 2010 (SU.FOL.O M3) | France                                                                          | RDBPCT (Secondary) | 2,501 patients with a history of MI, unstable angina, or ischaemic stroke (61; 20) | 4.7 (4.7)   | Folic acid (560 µg/d) + vitamin B6 (3 mg/d) + vitamin B12 (20 µg/d) ± omega-3 fatty acids (EPA and DHA at a ratio of 2:1) vs. placebo                  | Major CV events (non-fatal MI, stroke, or CV death) | 75/1242  | 82/1259  |
| 48 | Graeme et al, 2010 (VITATOPS)   | 20 countries from four continents including Australia, U.K., New Zealand, etc.) | RDBPCT (Secondary) | 8,164 patients with recent TIA or stroke (63; 36)                                  | 3.4 (3.4)   | Folic acid (2 mg/d) + vitamin B6 (25 mg/d) + vitamin B12 (0.5 mg/d) vs. placebo                                                                        | Stroke, MI, or vascular death                       | 616/4089 | 678/4075 |
| 49 | Bostom et al, 2011 (FAVORIT)    | U.S.                                                                            | RDBPCT (Primary)   | 4,110 stable kidney transplant recipients (52; 37)                                 | 4 (4)       | Folic acid (5.0 mg/d) + vitamin B6 (50 mg/d) + vitamin B12 (1 mg/d) vs. vitamin B6 (1.4 mg/d) + vitamin B12 (2.0 µg/d) with multivitamins in both arms | Any primary CVD outcome                             | 269/2056 | 278/2054 |
| 50 | Sesso et al, 2012 (PHS2)        | U.S.                                                                            | RDBPCT (Primary)   | 14,641 U.S. male physicians (64; 0)                                                | 11.2 (11.2) | Multivitamin vs. placebo                                                                                                                               | Major CV events                                     | 876/7317 | 856/7324 |

\* Vitamins A/B<sub>1</sub>/B<sub>2</sub>/B<sub>6</sub>/B<sub>12</sub>/C/D/E, folic acid, beta-carotene, biotin, pantothenic acid, calcium, phosphorus, iodine, iron, magnesium, copper, manganese, potassium, chloride, molybdenum, selenium, and zinc.

† Vitamins B<sub>1</sub>/B<sub>3</sub>/B<sub>6</sub>/B<sub>12</sub>/C, pantothenic acid, and biotin.

n.a., not available; RDBPCT, randomised, double-blind, placebo-controlled trial; OLRCT, open-label, randomised, controlled trial; AMI, acute myocardial infarction; TIA, transient ischemic attack; CV, cardiovascular; MI, myocardial infarction; HRT, hormone replacement therapy; DM, diabetes mellitus; HDL, high-density lipoprotein; CHD, coronary heart disease; CAD, coronary artery disease; CRF, chronic renal failure; EPA, eicosapentanoic acid; DHA, docosahexaenoic acid

CARET, the Beta-Carotene and Retinol Efficacy Trial; CHAOS, the Cambridge Heart Antioxidant Study; LNIT, the Linxian Nutrition Intervention Trial; PHS, the Physicians' Health Study; SCP, the Skin Cancer Prevention Study; ATBC, the Alpha-tocopherol Beta-carotene Cancer Prevention Study; GISSI, the Gruppo Italiano per lo Studio della Sopravvivenza nell'Infarto miocardico-Prevenzione trial; KOS, the Kuopio Osteoporosis Study; NSCP, the Nambour Skin Cancer Prevention trial; HOPE, the Heart Outcomes Prevention Evaluation Study; SPACE, Secondary Prevention with Antioxidants of Cardiovascular disease in Endstage renal disease; HATS, the HDL-Atherosclerosis Treatment Study; PPP, the Primary Prevention Project; HPS, the Heart Protection Study; SU.VI.MAX, the Supplementation en Vitamines et Mineraux Antioxydants; WHS, the Women's Health Study; ASFAST, the Atherosclerosis and Folic Acid Supplementation Trial; HOPE-2, The Heart Outcomes Prevention Evaluation 2 study; NORVIT, the Norwegian Vitamin Trial; NPC, the Nutritional Prevention of Cancer trial; WHI, the Women's Health Initiative; ICARE, the Israel Cardiovascular Events Reduction with Vitamin E trial; WAFACS, the Women's Antioxidant and Folic Acid Cardiovascular Study; WENBIT, the Western Norway B Vitamin Intervention Trial; BVAIT, the B-Vitamin Atherosclerosis Intervention Trial; DIVINE, the Diabetic Intervention with Vitamins to Improve Nephropathy; SEARCH, the Study of the Effectiveness of Additional Reductions in Cholesterol and Homocysteine study; SU.FOL.OM3, the

Supplémentation en Folates et Omega-3; VITATOPS, the Vitamins to Prevent Stroke trial; VISP, the Vitamin Intervention for Stroke Prevention randomised controlled trial; FAVORIT, the Folic Acid for Vascular Outcome Reduction in Transplantation trial.
